# Supplementary material for: Breast Cancer and Income Loss in Denmark: Heterogeneous Outcomes and Longitudinal Effects
Source: Research Square preprint supplement (doi:10.21203/rs.3.rs-5448821/v1), 2024-12-12
Supplement: Supplementary file 2 [file 4ccef2d50e2fa0c2f60521fa.xlsx]

## Sheet: Sheet1
Supplementary Table 4: Interaction coefficients and standard error in event study difference-in-difference.
Coefficients represent the interaction between exposure and each covariate of interest. Coefficients and standard error are reported in 2023 Euros, and negative effects indicate a positive effect on income compared to the baseline stratification (e.g. age 18 to 29 for age stratifications).
Interaction term with exposure	Coefficient	Standard error	P-value
Age 30 to 34	-406	144	0.01
Age 35 to 39	-404	116	0.002
Age 40 to 45	-726	131	<0.0001
Age 45 to 49	-947	137	<0.0001
Age 50 to 54	-1032	143	<0.0001
Age 55 to 59	-1252	148	<0.0001
Age 60 to 64	-1551	193	<0.0001
Age 65 to 69	-1260	142	<0.0001
Age 70 to 74	-1143	135	<0.0001
Age 75 to 79	-1228	144	<0.0001
Age 80 to 84	-1745	141	<0.0001
Age 85 to 89	-2118	155	<0.0001
Age 90 to 120	-3277	326	<0.0001
Basic education	152	54	0.01
Postgraduate education	-1392	157	<0.0001
Upper secondary education	-401	91	<0.0001
Vocational training	3	44	0.95
Household size 2	-234	66	0.002
Household size 3 or greater	-278	103	0.013
Relationship status: unmarried partnered	-267	58	<0.0001
Relationship status: single	-37	75	0.63
CCI: 1	-93	18	<0.0001
CCI: 2	-103	44	0.028
CCI: 3	-325	60	<0.0001
CCI: 4 or greater	-1040	80	<0.0001
Hospital utilization: 1	-520	85	<0.0001
Hospital utilization: 2	-683	75	<0.0001
Hospital utilization: 3 to 5	-527	75	<0.0001
Hospital utilization: 6 to 10	-856	116	<0.0001
Hospital utilization: 11 or more	-832	104	<0.0001
Region Midtjylland	-320	25	<0.0001
Region Nordjylland	-237	31	<0.0001
Region Sjaelland	-272	24	<0.0001
Region Syddanmark	-233	30	<0.0001
Labor market attachment: in school	-1828	320	<0.0001
Labor market attachment: sick or parental leave	-142	158	0.38
Labor market attachment: other	554	169	0.003
Labor market attachment: self employed	74	155	0.64
Labor market attachment: social assistance recipient	-405	133	0.006
Labor market attachment: unemployed <6 months	-226	121	0.076
Labor market attachment: wage earner	-4	69	0.96
Labor market attachment: working for spouse	390	206	0.072
