# Supplementary material for: Breast Cancer and Income Loss in Denmark: Heterogeneous Outcomes and Longitudinal Effects
Source: Research Square preprint supplement (doi:10.21203/rs.3.rs-5448821/v1), 2024-12-12
Supplement: Supplementary file 3 [file fd84333314250c9c50475980.xlsx]

## Sheet: Sheet1
Table 3: Conditional average causal effect by select characteristics for personal income, household income, and personal income adjusted for mortality.
CACE and standard error are reported in 2023 Euros, and a negative CACE value indicates a positive effect of breast cancer on income as compared to controls.
Outcome	Stratification	Subgroup	Count exposed	CACE	Standard error
Personal income	Age	18 to 29	242	745	997
Personal income	Age	30 to 34	686	8869	762
Personal income	Age	35 to 39	1567	10632	762
Personal income	Age	40 to 45	3120	11732	585
Personal income	Age	45 to 49	5141	7648	466
Personal income	Age	50 to 54	6183	8470	423
Personal income	Age	55 to 59	7169	6453	401
Personal income	Age	60 to 64	5446	2685	412
Personal income	Age	65 to 69	1170	7771	685
Personal income	Age	70 to 74	53	-62769	4256
Personal income	Age	75 to 79	15	31910	6967
Personal income	Age	80 to 84	7	-29507	7807
Personal income	Age	85 to 89	<5	-6207	684
Personal income	CCI	0	28189	7313	196
Personal income	CCI	1	1674	4798	496
Personal income	CCI	2	734	4245	802
Personal income	CCI	3	109	22945	1931
Personal income	CCI	4 or greater	96	-3056	1997
Personal income	Education	Unknown	334	835	1148
Personal income	Education	Bachelor	6964	10307	430
Personal income	Education	Basic	8292	3472	237
Personal income	Education	Higher education	1736	20072	1192
Personal income	Education	Upper secondary	1110	6405	882
Personal income	Education	Vocational training	12366	6390	307
Personal income	Hospital utilization	0	12016	6408	326
Personal income	Hospital utilization	1	6672	6597	384
Personal income	Hospital utilization	2	4010	7159	431
Personal income	Hospital utilization	11+	598	188	959
Personal income	Hospital utilization	3 to 5	4387	9148	418
Personal income	Hospital utilization	6 to 10	3119	9985	460
Personal income	Household size	1	6609	4347	347
Personal income	Household size	2	14551	6039	267
Personal income	Household size	3+	9642	10692	354
Personal income	Labor market attachment	Disability recipient	4459	-2191	182
Personal income	Labor market attachment	In school	177	22163	1848
Personal income	Labor market attachment	Sick or parental leave	378	9009	842
Personal income	Labor market attachment	Other	606	-1275	1198
Personal income	Labor market attachment	Self employed	816	3899	1235
Personal income	Labor market attachment	Social assistance recipient	643	4727	710
Personal income	Labor market attachment	Unemployed	698	4373	660
Personal income	Labor market attachment	Wage earner	22861	9207	234
Personal income	Labor market attachment	Working for spouse	164	3756	1254
Personal income	Personal income quartile	1st quartile	3130	-2221	328
Personal income	Personal income quartile	2nd quartile	7597	3931	215
Personal income	Personal income quartile	3rd quartile	10977	7975	292
Personal income	Personal income quartile	4th quartile	9098	12134	473
Personal income	Region	Hovedstaden	9639	5704	396
Personal income	Region	Midtjylland	6514	7330	383
Personal income	Region	Nordjylland	2888	6406	462
Personal income	Region	Sjaelland	4811	10664	431
Personal income	Region	Syddanmark	6950	6816	335
Personal income	Relationship status	Married	19198	7934	251
Personal income	Relationship status	Partnered, unmarried	2994	4448	422
Personal income	Relationship status	Single	8610	6142	298
Personal income, adjusted for mortality	Age	18 to 29	242	89694	1198
Personal income, adjusted for mortality	Age	30 to 34	686	73626	1009
Personal income, adjusted for mortality	Age	35 to 39	1567	59258	892
Personal income, adjusted for mortality	Age	40 to 45	3120	50299	739
Personal income, adjusted for mortality	Age	45 to 49	5141	43711	622
Personal income, adjusted for mortality	Age	50 to 54	6183	42279	535
Personal income, adjusted for mortality	Age	55 to 59	7169	26383	462
Personal income, adjusted for mortality	Age	60 to 64	5446	5304	422
Personal income, adjusted for mortality	Age	65 to 69	1170	7771	685
Personal income, adjusted for mortality	Age	70 to 74	53	-62769	4256
Personal income, adjusted for mortality	Age	75 to 79	15	31910	6967
Personal income, adjusted for mortality	Age	80 to 84	7	-29507	7807
Personal income, adjusted for mortality	Age	85 to 89	<5	-6207	684
Personal income, adjusted for mortality	CCI	0	28189	35318	240
Personal income, adjusted for mortality	CCI	1	1674	26545	532
Personal income, adjusted for mortality	CCI	2	734	22409	926
Personal income, adjusted for mortality	CCI	3	109	28318	2335
Personal income, adjusted for mortality	CCI	4 or greater	96	30403	3235
Personal income, adjusted for mortality	Education	Unknown	334	28937	1120
Personal income, adjusted for mortality	Education	Bachelor	6964	40945	550
Personal income, adjusted for mortality	Education	Basic	8292	26288	295
Personal income, adjusted for mortality	Education	Higher education	1736	51158	1424
Personal income, adjusted for mortality	Education	Upper secondary	1110	53414	1011
Personal income, adjusted for mortality	Education	Vocational training	12366	33230	370
Personal income, adjusted for mortality	Hospital utilization	0	12016	37910	406
Personal income, adjusted for mortality	Hospital utilization	1	6672	30945	473
Personal income, adjusted for mortality	Hospital utilization	2	4010	33936	494
Personal income, adjusted for mortality	Hospital utilization	11+	598	18937	1072
Personal income, adjusted for mortality	Hospital utilization	3 to 5	4387	32362	463
Personal income, adjusted for mortality	Hospital utilization	6 to 10	3119	33568	518
Personal income, adjusted for mortality	Household size	1	6609	29789	429
Personal income, adjusted for mortality	Household size	2	14551	27244	308
Personal income, adjusted for mortality	Household size	3+	9642	48943	460
Personal income, adjusted for mortality	Labor market attachment	Disability recipient	4459	14320	248
Personal income, adjusted for mortality	Labor market attachment	In school	177	77001	1738
Personal income, adjusted for mortality	Labor market attachment	Sick or parental leave	378	41992	825
Personal income, adjusted for mortality	Labor market attachment	Other	606	5450	1155
Personal income, adjusted for mortality	Labor market attachment	Self employed	824	32275	1236
Personal income, adjusted for mortality	Labor market attachment	Social assistance recipient	643	35370	665
Personal income, adjusted for mortality	Labor market attachment	Unemployed	698	28378	735
Personal income, adjusted for mortality	Labor market attachment	Wage earner	22861	38932	290
Personal income, adjusted for mortality	Labor market attachment	Working for spouse	164	22320	1316
Personal income, adjusted for mortality	Personal income quartile	1st quartile	3130	11355	348
Personal income, adjusted for mortality	Personal income quartile	2nd quartile	7597	26903	259
Personal income, adjusted for mortality	Personal income quartile	3rd quartile	10977	36605	363
Personal income, adjusted for mortality	Personal income quartile	4th quartile	9098	47126	583
Personal income, adjusted for mortality	Region	Hovedstaden	9639	35297	482
Personal income, adjusted for mortality	Region	Midtjylland	6514	33764	458
Personal income, adjusted for mortality	Region	Nordjylland	2888	33937	563
Personal income, adjusted for mortality	Region	Sjaelland	4811	40843	535
Personal income, adjusted for mortality	Region	Syddanmark	6950	30225	416
Personal income, adjusted for mortality	Relationship status	Married	19198	32535	308
Personal income, adjusted for mortality	Relationship status	Partnered, unmarried	2994	44107	486
Personal income, adjusted for mortality	Relationship status	Single	8610	35957	370
Household income	Age	18 to 29	236	-16438	731
Household income	Age	30 to 34	678	-7175	497
Household income	Age	35 to 39	1565	-702	461
Household income	Age	40 to 45	3104	959	415
Household income	Age	45 to 49	5121	2257	401
Household income	Age	50 to 54	6150	1307	384
Household income	Age	55 to 59	7148	2736	355
Household income	Age	60 to 64	5426	1352	329
Household income	Age	65 to 69	1158	11237	553
Household income	Age	70 to 74	55	-36943	2764
Household income	Age	75 to 79	14	30792	4439
Household income	Age	80 to 84	7	-33057	1035
Household income	Age	85 to 89	<5	-3243	0
Household income	CCI	0	28082	1502	165
Household income	CCI	1	1653	1704	398
Household income	CCI	2	738	10911	711
Household income	CCI	3	103	-15302	1207
Household income	CCI	4 or greater	88	6836	1860
Household income	Education	Unknown	311	3945	856
Household income	Education	Bachelor	6939	3777	368
Household income	Education	Basic	8252	125	221
Household income	Education	Higher education	1733	1082	762
Household income	Education	Upper secondary	1111	647	606
Household income	Education	Vocational training	12318	1658	264
Household income	Hospital utilization	0	11995	1144	265
Household income	Hospital utilization	1	6650	1426	339
Household income	Hospital utilization	2	3992	1832	386
Household income	Hospital utilization	11+	579	7808	880
Household income	Hospital utilization	3 to 5	4360	1554	355
Household income	Hospital utilization	6 to 10	3088	3912	367
Household income	Household income quartile	1st quartile	2914	-1722	264
Household income	Household income quartile	2nd quartile	6589	261	174
Household income	Household income quartile	3rd quartile	9044	1567	230
Household income	Household income quartile	4th quartile	12117	3279	326
Household income	Household size	1	6583	1250	237
Household income	Household size	2	14486	1480	245
Household income	Household size	3+	9595	2301	280
Household income	Labor market attachment	Disability recipient	4413	-272	173
Household income	Labor market attachment	In school	173	-5102	1456
Household income	Labor market attachment	Sick or parental leave	356	-4642	849
Household income	Labor market attachment	Other	581	-6033	902
Household income	Labor market attachment	Self employed	819	1717	812
Household income	Labor market attachment	Social assistance recipient	629	-493	541
Household income	Labor market attachment	Unemployed	669	1480	624
Household income	Labor market attachment	Wage earner	22861	2433	197
Household income	Labor market attachment	Working for spouse	163	1343	1768
Household income	Region	Hovedstaden	9617	1277	317
Household income	Region	Midtjylland	6488	1697	335
Household income	Region	Nordjylland	2879	704	385
Household income	Region	Sjaelland	4768	4380	377
Household income	Region	Syddanmark	6912	823	295
Household income	Relationship status	Married	19146	1862	219
Household income	Relationship status	Partnered, unmarried	2936	595	373
Household income	Relationship status	Single	8582	1651	203
